# Supplementary material for: Finely crafted quasi-core–shell gadolinium/layered double hydroxide hybrids for switching on/off bimodal CT/MRI contrasting nanodiagnostic platforms
Source: Royal Society of Chemistry journal article supplement (doi:10.1039/c9ra08159c), 2020-01-01
Supplement: c9ra08159c1.pdf [file c9ra08159c1.pdf]

## Electronic Supplementary Information

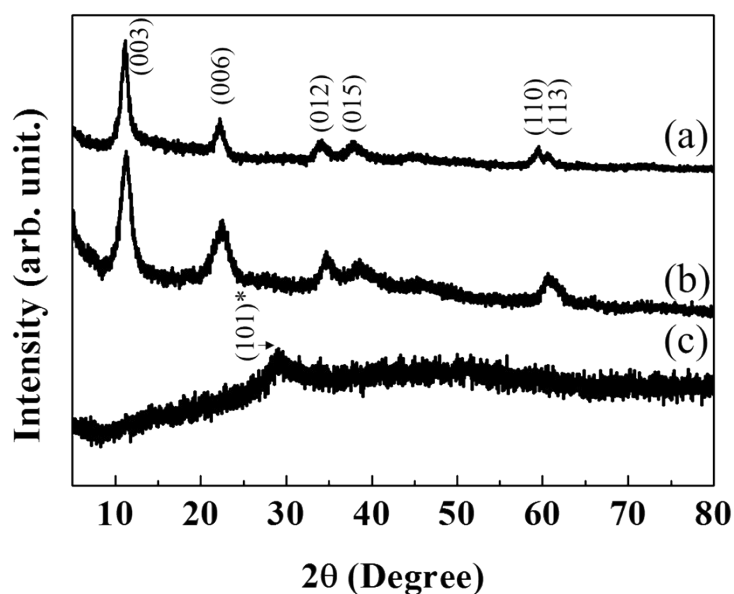

Figure S1. XRD patterns of (a) MgAl-LDH, (b) MgGa-LDH, and (c) Gd(OH)<sub>3</sub>.

Table S1. CT values of  
MgAl-LDH and MgGa-  
LDH.

| Concentration (mg/mL) | MgAl-LDH | MgGa-LDH |
|-----------------------|----------|----------|
| 0.2                   | 52       | 47       |
| 0.4                   | 52       | 53       |
| 0.6                   | 52       | 52       |
| 0.8                   | 58       | 48       |
| 1                     | 73       | 66       |
| 2                     | 63       | 47       |
| 3                     | 43       | 58       |
| 4                     | 77       | 66       |
| 5                     | 58       | 78       |

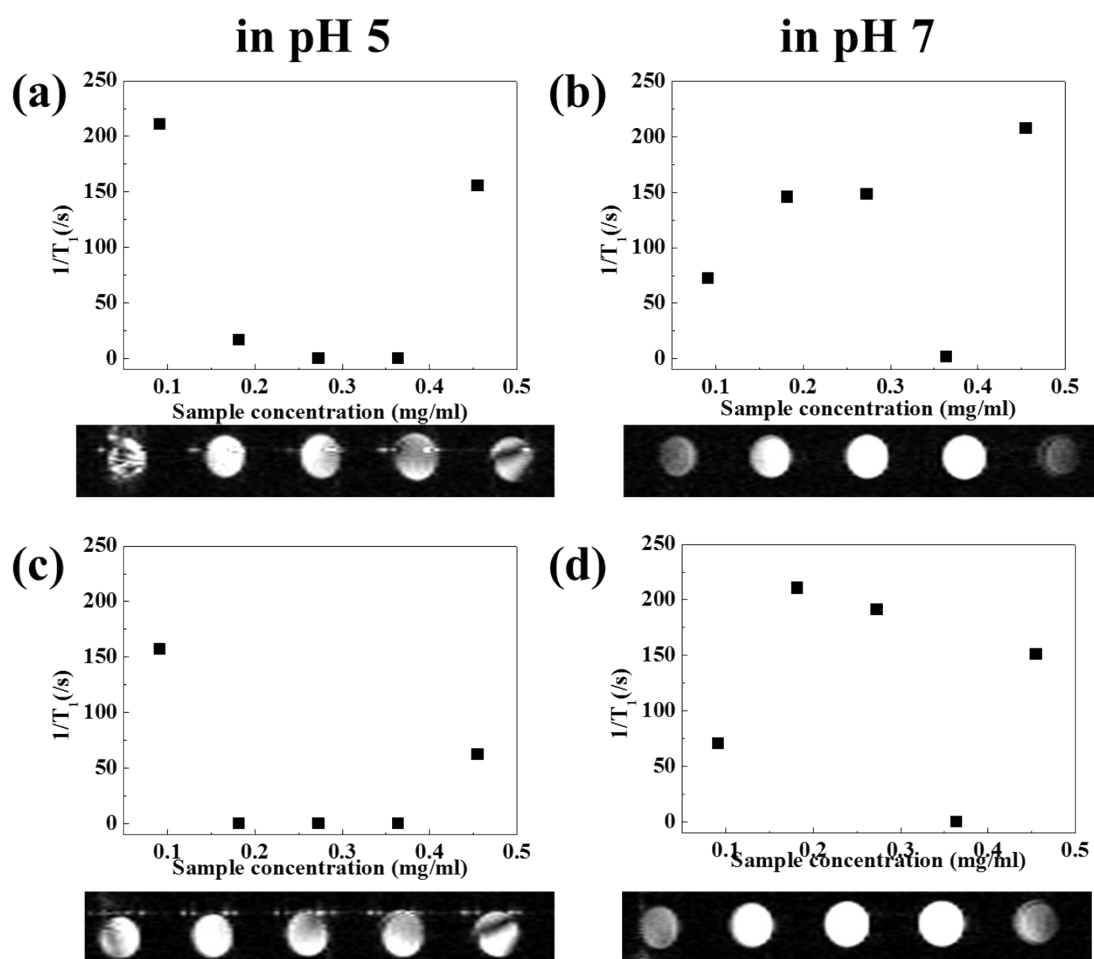

Fig S2: T1 relaxivity plot and MR image of (a) MgAl-LDH in pH 5, (b) MgAl-LDH in pH 7, (c) MgGa-LDH in pH 5, (d) MgGa-LDH in pH 7.

Sample concentration (mg/mL) §

§ As bare LDH did not contain Gd moiety, the LDH concentration was set same to the LDH moiety in the Gd-containing hybrids.

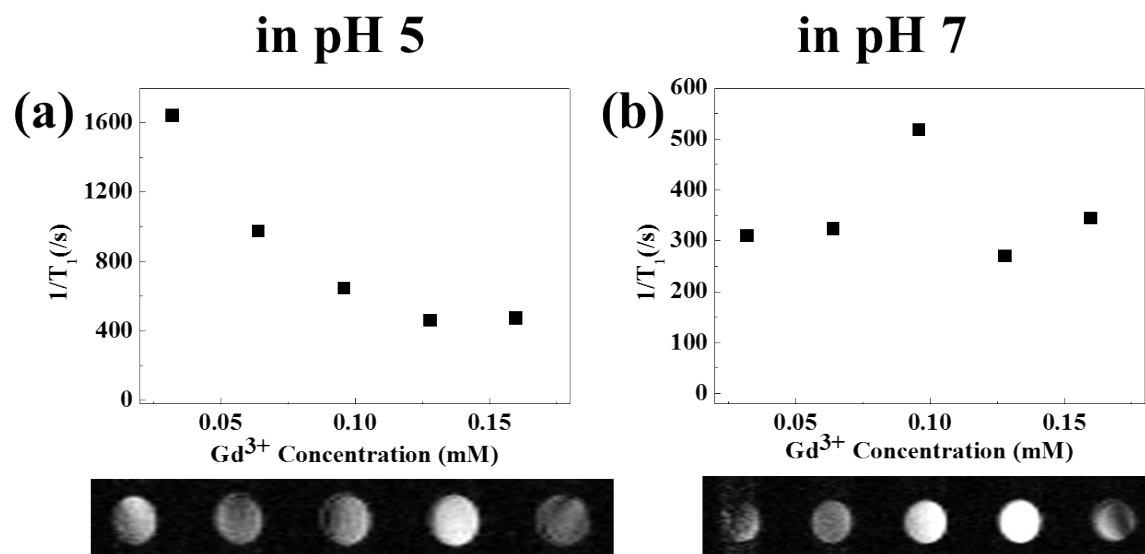

Figure S3: T1 relaxivity plot and MR image of (a) Gd(OH)<sub>3</sub> in pH 5 and (b) Gd(OH)<sub>3</sub> in pH 7.
